# Supplementary material for: Highly efficient, all-solution-processed, flexible white quantum dot light-emitting diodes
Source: Royal Society of Chemistry journal article supplement (doi:10.1039/c8tc03155j), 2018-01-01
Supplement: c8tc03155j1.pdf [file c8tc03155j1.pdf]

## Support information

# Highly Efficient, All-Solution-Processed, Flexible White Quantum Dot Light-Emitting Diodes

Piaoyang Shen, Xiaomin Li, Fan Cao, Xingwei Ding and Xuyong Yang\*

Key Laboratory of Advanced Display and System Applications of Education of  
Ministry, Shanghai University, 149 Yanchang Road, Shanghai 200072, P. R. China

\* To whom correspondence should be addressed. Email: yangxy@shu.edu.cn

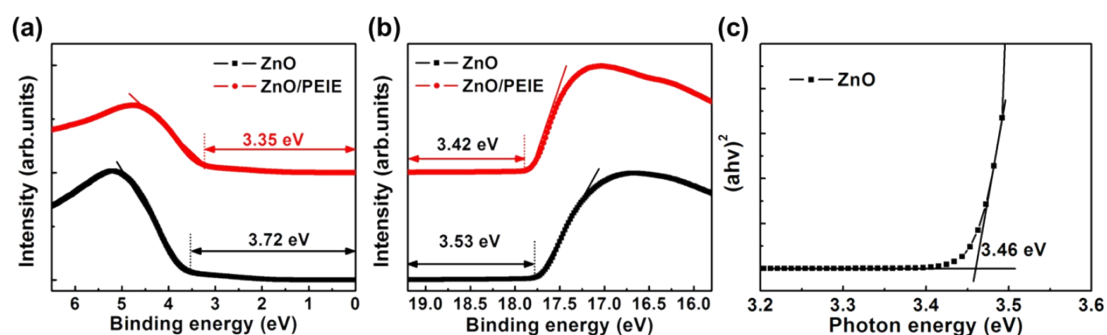

**Fig. S1** UPS spectra showing (a) valence-band edge regions and (b) high-binding energy secondary electron cutoff of ZnO and ZnO/PEIE films (PEIE is 0.4 wt%). (c)  $(Ah\nu)^2 - h\nu$  plots converted from absorption spectra of ZnO.

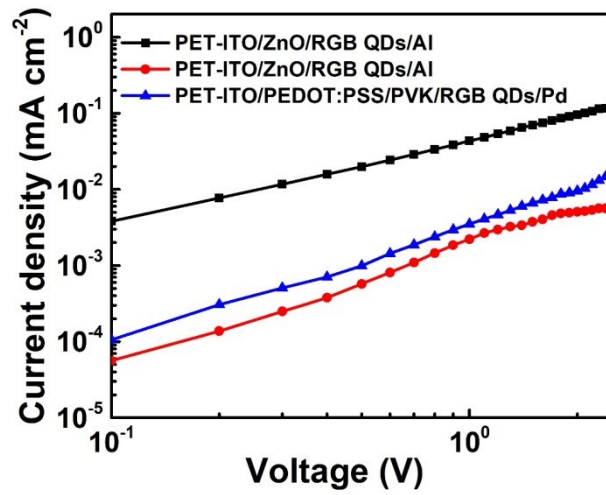

**Fig. S2** J-V characteristics of the electron-only and hole-only devices.

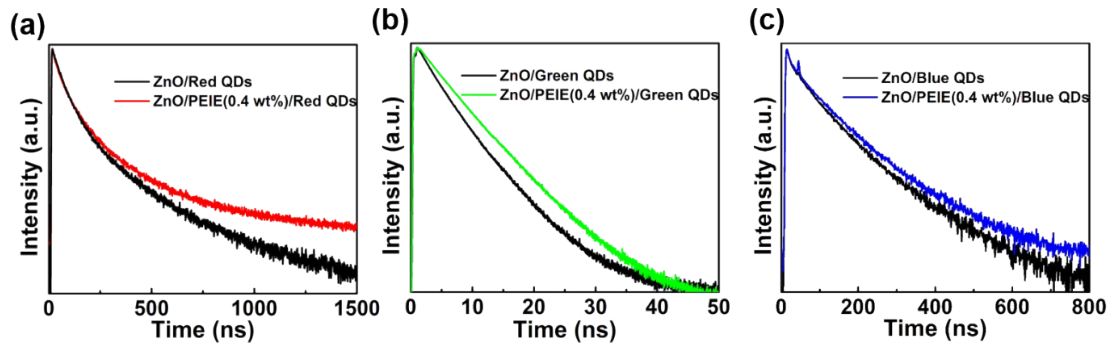

**Fig. S3** Time-resolved PL decay curves for (a) red QD, (b) green QD and (c) blue QD films with and without PEIE deposited on ZnO layers.

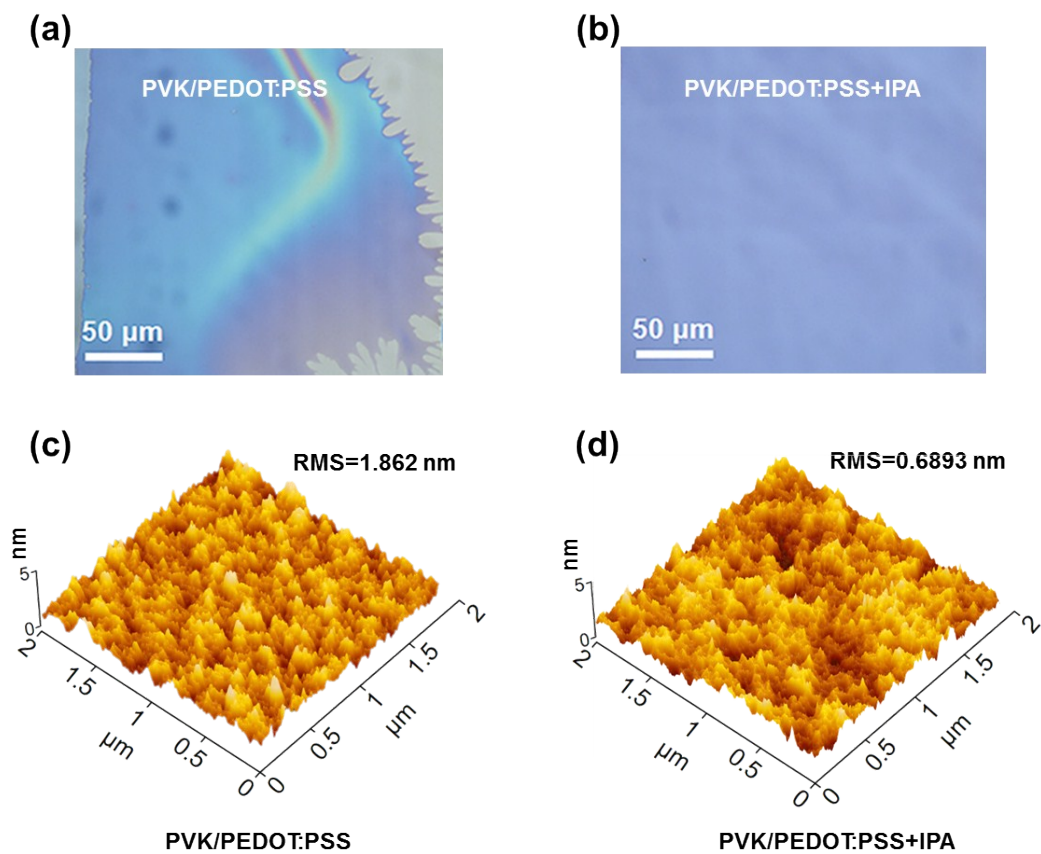

**Fig. S4** Optical microscopy and AFM images of (a, c) PEDOT:PSS and (b, d) PEDOT:PSS mixed with IPA spin-coated on PVK films on glass substrates, respectively.

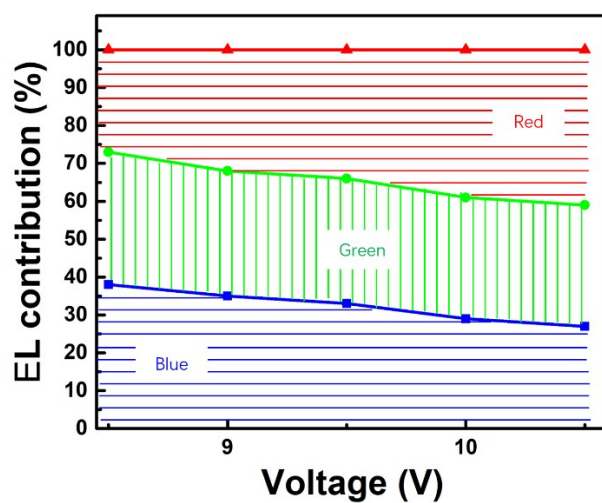

**Fig. S5** Areal contribution of each individual color to the entire white EL spectra of QLEDs under different applied voltages.
